# Supplementary material for: Effect of Viral Strain and Host Age on Clinical Disease and Viral Replication in Immunocompetent Mouse Models of Chikungunya Encephalomyelitis
Source: MDPI journal article supplement (doi:10.3390/v15051057), 2023-04-26
Supplement: s1 [file s1]

## Supplementary Material

Supplementary Table S1. qPCR Primer Probes.

| Gene target  | Company            | Assay ID/Cat. #     | Ref Seq       |
|--------------|--------------------|---------------------|---------------|
| <i>Gapdh</i> | Applied Biosystems | 4352932E            | NM_008084(2)  |
| <i>Ifna4</i> | IDT                | Mm.PT.587678281.g   | NM_010504(1)  |
| <i>Ifnb1</i> | IDT                | Mm.PT.58.30132453.g | NM_010510     |
| <i>Ifng</i>  | IDT                | Mm.PT.58.41769240   | NM_008337(1)  |
| <i>Il4</i>   | IDT                | Mm.PT.58.7882098    | NM_021283(1)  |
| <i>Il6</i>   | IDT                | Mm.PT.58.10005566   | NM_031168(1)  |
| <i>Il10</i>  | IDT                | Mm.PT.58.13531087   | NM_010548(1)  |
| <i>Il17a</i> | IDT                | Mm.PT.58.6531092    | NM_0105532(1) |
| <i>Tnf</i>   | IDT                | Mm.PT.58.12575861   | NM_013693(1)  |
